# Supplementary material for: Significant hearing loss in Fabry disease: Study of the Danish nationwide cohort prior to treatment
Source: PLoS One. 2019 Dec 6;14(12):e0225071. doi: 10.1371/journal.pone.0225071 (PMC6897399; doi:10.1371/journal.pone.0225071)
Supplement: S1 File — Data used in the analysis. (XLSX) [file pone.0225071.s001.xlsx]

## Sheet: Ark1
PT_ID	Sex	age	AudDato	L250	L500	L1k	L2k	L4k	L8k	R250	R500	R1k	R2k	R4k	R8k	L_DS	R_DS	L_SRT	R_SRT	a-gal	CR-EDTA /173	Gb3	LVMI1	AlbuminPerDay
1	1	9	2009-09-14	0	0	0	0	10	10	5	0	0	0	5	5	100	100	0	0	2.8	106	-		67.3
2	1	10	2003-10-21	10	10	15	25	50	70	10	10	5	5	20	40	100	100	15	5		112	10.7		8.1
3	2	10	2004-02-19	10	0	5	5	5	25	15	15	15	10	10	15	100	95	5	10	9	87	3.93		28
4	2	11	2009-09-14	5	5	0	-5	5	5	10	5	0	0	5	15	100	100	0	5	20	107	-		183
5	1	11	2004-06-08	20	15	10	10	10	5	15	15	10	10	10	15	100	100	15	15	2.3	107	7.59		4
6	2	11	2004-09-30	0	0	5	5	5	5	10	5	10	5	15	20	100	100	0	5			-
7	2	12	2010-10-26	0	0	0	5	0	0	0	0	0	5	-5	0	100	100	0	0		117	-
8	2	12	2004-02-18	10	10	0	0	5	15	5	0	0	5	0	15	100	100	10	0		95	-		4.21
9	1	12	2013-03-07	15	5	0	5	5	15	10	5	0	5	10	25	100	100	0	0	1.5	129	11.9
10	1	13	2002-01-08	-5	0	-5	-5	-5	5	10	10	0	5	5	5	100	100		5	1.6	96	-	73	7
11	2	13	2012-02-29	5	0	0	5	0	10	10	5	-5	0	5	5	100	100	0	0		107	6.1
12	2	13	2013-10-02	0	5	0	5	5	15	5	0	0	10	5	15	100	100	0	0		120	3.7
13	1	13	2007-12-21	10	0	0	5	10	10	10	5	5	5	5	5	100	100	0	5		114			512
14	1	14	2002-01-08	5	5	-5	0	10	15	5	0	0	5	10	20	100	100	0		1.7	110	-	77	548
15	2	15	2015-08-20	10	10	0	5	0	0	5	5	0	10	5	5	100	100	0	0		96			25
16	1	15	2014-09-17	5	5	0	30			5	0	0	0	5	10	98	100				93	5.4		32
17	2	16	2010-02-10	0	-5	-5	0	0	30	0	0	0	5	10	20	100	100	0	5		106		68.9	698
18	2	17	2007-04-02	0	0	0	0	0	5	5	0	0	0	0	5	100	100	0	0	13	106	3.3	76
19	2	18	2008-08-14	10	10	5	5	10	20	15	15	10	10	5	15	100	100	4	9	9.3	103	4.8	58
20	2	19	2014-09-16	5	5	5	10	15	20	5	5	0	5	10	20	100	100	5	0		107	3.1		15.8
21	1	21	2003-12-10	10	5	5	15	5	15	5	5	5	0	0	30			5	0		90	8.05	92.25	24
22	2	23	2014-09-16	5	5	10	5	5	20	10	10	5	20	10	25	100	100	0	5		107	2		159
23	1	24	2005-05-24	10	10	20	30	50	70	5	5	5	15	75	65	100	100	10	5	2.2	75	6.29	127.87	28
24	2	26	2003-06-18	10	5	0	0	10	15	10	5	0	15	5	5	100	100		0	10	64	6.18	93.87	298
25	2	26	2014-12-11	0	0	0	0	5	20	0	0	0	0	5	15	100	100	0	0		94	3
26	2	27	2014-08-11	10	10	5	15	10	30	10	5	10	15	15	40	100	100	10	10		93	3.3
27	1	27	2015-11-06	10	10	5	15	20	20	5	5	10	10	15	15	100	96	0	5
28	1	29	2008-10-31	5	5	0	-5	0	10	15	10	10	0	5	10	98	100	0	5		21	5	115
29	2	30	2015-01-22	0	0	0	0	5	20	0	0	0	0	5	20	100	100	0	0		107	2.1
30	2	31	2003-12-16	25	10	10	10	5	15	15	5	5	10	5	15			20	5	19	116	2.55	58.18	1012
31	1	32	2001-11-07	5	5	0	10	10	15	0	0	0	5	10	15	100	100	0	0		22		197.48
32	2	32	2004-01-08	0	0	0	-5	0	5	0	0	5	0	-5	5	100	100	0	0	12	107	3.54	84.63
33	2	33	2007-11-30	5	5	5	15	5	10	0	0	5	10	5	10	100	100	5	0	21	93	4.6	95	3284
34	1	33	2004-06-08	5	5	5	0	15	15	10	10	10	5	30	25	100	100	5	10	1.6	25	7.17	119.93	97
35	1	33	2004-04-05	10	5	5	10	10	35	5	5	0	5	5	20	100	100	5	5	1.6	99	-	91.82	1003
36	2	34	2001-11-08	20	20	10	5	5	35	10	10	5	0	10	15	100	95	15	15		106		50.09	18
37	1	34	2001-10-29	20	30	30	15	55	50	15	25	15	5	45	55	100	95	25	10	1.1	37	5.33		36
38	1	34	2002-05-14	5	5	5	20	15	20	5	10	15	15	10	15	100	100	5	0	1.7	82	10.7	97.02
39	1	34	2002-02-28	5	5	0	5	5	5	10	10	20	0			100	95	0	5	1.7	76	6.09	126.12	2141
40	1	34	2002-04-23	5	5	10	10	10	15	10	15	20	15	10	30	100	100	5	5		97		86.71
41	1	34	2014-08-21	25	5	0	5	60	45	5	0	0	5	15	30	100	100	5	0	1.6	89	11.1	81.5	50
42	1	35	2010-06-11	10	10	5	0	15	25	5	5	0	5	45	5	100	100	0	0	1.8	88	8.4	115.2	7
43	2	35	2001-12-11	10	10	10	10	5		0	5	15	10	5	10	100	100	5	10	4.5	89	3.78	116.2
44	1	36	2010-11-03	5	10	5	15	10	15	0	5	10	10	15	20	100	97	10	5	3.1	105	2.9	96.9	2317
45	2	36	2013-07-09	0	0	0	5	10	20	0	0	5	10	10	20	100	100	0	0	11	100	6	83.2	423
46	2	37	2013-05-14	5	0	0	0	15	35	5	5	5	5	15	30	100	100	0	5	28	108	7.2	91.3
47	1	37	2012-12-19	5	0	5	5	5	40	10	-5	0	0	5	10	100	100	0	0	1.3		6.1	136
48	2	38	2002-01-15	0	5	0	10	0	10	0	10	5	10	0	5	100	100	0	0	16	93	2.69	123.27
49	2	38	2009-04-29	5	10	5	15	5	45	10	0	5	10	15	55	100	100	5	5	13	94	3.3	81	4
50	1	39	2011-09-29	5	5	0	10	0	20	0	0	0	10	0	20	100	100	5	5	1.6	91	2.8	132.8
51	2	40	2008-10-08	0	-5	-5	5	10	10	-5	0	0	0	15	10	100	100	-5	0	21	83	3.1	93
52	1	40	2015-01-08	0	0	0	0	15	35	0	5	5	0	20	40	100	100	0	0	2	56	7.1
53	2	42	2013-01-18	5	5	20	20	15	50	0	5	0	15	10	40	100	100	5	0	11		2	50.8	35
54	2	42	2014-03-25	10	10	10	20	30	60	15	10	10	5	30	25	100	100	10	5		101	3.9		16
55	2	43	2002-05-07	5	10	10	15	20	55	0	5	-5	10	10	20	100	100	10	5	12	108	5.34	101.49	352
56	2	43	2014-10-21	0	0	5	5	5	5	0	0	5	10	5	15	100	100	0	0	17	82	3.2	75.6	370
57	2	44	2013-04-12	-5	0	-5	5	5	20	-5	-5	-5	5	5	20	100	100	-5	-5	21	90	4.5	101.2
58	2	44	2012-11-13	5	10	0	5	20	10	10	5	5	15	20	15	100	100	5	5	22	104	2	58
59	1	44	2011-09-27	10	10	10	10	20	15	10	15	10	10	15	30	100	100	5	5	2.5	101	4.3	106	96
60	2	45	2007-06-06	5	0	0	5	10	5	5	5	5	0	5	5	100	100	0	0	26	96	4.7	102.63	510
61	1	46	2012-09-03	10	5	10	10	20	40	10	0	5	10	25	35	100	100	10	5	3.1	75	5.4	116.9	1513
62	2	47	2013-12-05	10	15	15	20	25	40	10	15	15	15	20	35	100	100	10	15	7.3	88	8.7	132.64
63	1	47	2008-09-18	5	0	0	0	20	40	30	20	0	10	10	40	100	100	0	10	2.2	50	8.6	128	89
64	2	50	2001-10-23	5	10	10	10	25	5	10	10	10	15	25	15	100	100	10	10	23	100	2.9	119.19	63.4
65	2	50	2008-09-15	5	10	25	25	10	10	0	0	25	25	15	15	100	100	10	0	10	64	4.1	101
66	2	52	2014-09-09	15	5	0	0	5	45	25	0	0	5	10	15	100	100	0	0	5.4	93	4.8		86
67	2	52	2004-01-06	15	15	10	35	40	75	10	15	15	35	45	75	95	100	10	10	24	74	3.62	104.14	111
68	2	53	2001-10-16	5	0	10	10	25	50	0	5	10	20	10	40			0	0		27		228.25
69	1	53	2012-06-18	30	25	15	25	95	100	20	15	20	25	50	100	68	96	25	25				271
70	2	53	2016-05-20	10	10	10	10	15	35	10	15	10	5	20	25							3.8		6.87
71	2	54	2003-12-02	0	5	10	20	15	55	10	5	20	20	25	60	100	100	5	5	1.8	80	7.04	231.47	7
72	2	54	2003-12-17	0	0	5	0	10	15	5	5	0	5			95	100	0	5	39	77	3.56	92.22	43
73	2	55	2001-11-13	0	0	5	5	10	30	15	15	10	10	15	20	100	100	0	10	17	81	3.06	97.85	10.4
74	2	56	2003-09-23	5	10	5	10	20	15	5	5	5	5	30	35	100	100	10	5	15	73	2.27	118.8	43
75	2	58	2016-05-10	0	5	5	15	45	25	5	10	10	15	50	45	100	100	0	0					16.7
76	2	60	2001-11-15	15	25	10	20	15		0	10	20	10	15	25	100	100	20	10	11	87	4.17	148.83	88.9
77	2	60	2003-12-01	15	10	5	15	15	25	15	20	15	10	15	50	100	100	10	15	33	84	3.97	208.86	1949
78	2	63	2013-10-23	10	15	10	25	25	30	15	15	15	25	30	25	100	100	10	10		88	4.3	164.7	4
79	2	64	2010-11-03	5	15	15	10	10	35	5	15	10	10	5	30	100	100	10	10	6.4	81	3.2	152	1798
80	2	66	2008-10-13	20	30	35	50	60	80	20	30	35	50	65	80	96	96	30	30	11	75	-	128.61	31.4
81	2	68	2011-09-21	5	15	10	15	20	30	10	15	15	20	30	50	100	100	10	15			3.7	174.2
82	2	68	2011-02-02	10	5	10	10	20	40	10	5	10	15	25	50	100	100	5	10	15	76	3.1	134	32
83	2	72	2013-10-30	10	10	10	40	40	75	10	15	15	30	60	85	100	100	10	15	21	69	7.1	181
